# Supplementary material for: Accelerating personalized medicine: Miniaturized patient-derived organoid drug screening for predicting cancer treatment responses and beyond
Source: Research Square preprint supplement (doi:10.21203/rs.3.rs-8254326/v1), 2025-12-22
Supplement: Supplementary file 1 [file 6e7c370b515a8ed9d691d327.pdf]

## Assay optimization

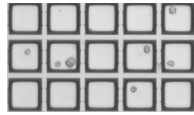

Seeding  
parameters

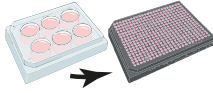

Transfer efficiency:  
PDOs/well

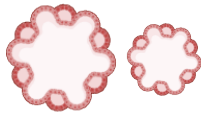

PDO size and  
heterogeneity

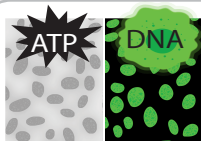

Readout  
optimization

## Assay miniaturization

PDO  
generation

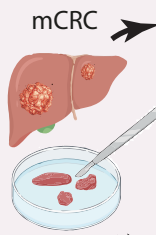

Expansion

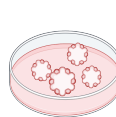

11 weeks

Drug screen

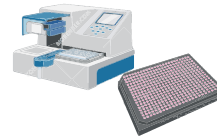

1 replicate

Results

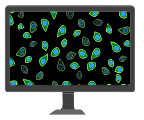

13 weeks

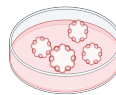

5 weeks

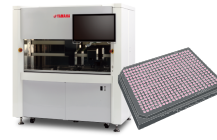

2 replicates

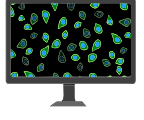

6 weeks

## Assay verification

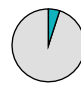

5% of PDOs  
required

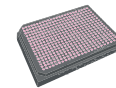

Correlation with  
250 PDOs/well assay

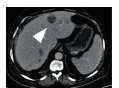

Correlation with  
patient response
